# Supplementary material for: Effects of dexmedetomidine on neurocognitive disturbance after elective non-cardiac surgery in senile patients: a systematic review and meta-analysis
Source: PubMed Central journal article supplement — J Int Med Res. 2021 May 13;49(5):03000605211014294. doi: 10.1177/03000605211014294 (PMC8371033; doi:10.1177/03000605211014294), 2021-05-13
Supplement: sj-pdf-1-imr-10.1177_03000605211014294.pdf [file sj-pdf-1-imr-10.1177_03000605211014294.pdf]

# Appendix

## Supplementary Table 1 Details about the search strategies

---

Search strategy terms for PubMed, EMBASE, Cochrane Library and CNKI (China National Knowledge Infrastructure) databases.

---

The PubMed search terms were as follows:121

((dexmedetomidine[Title/Abstract])) AND (((POD[Title/Abstract])) OR (POCD[Title/Abstract])) OR  
(((postoperative delirium[Title/Abstract])) OR (postoperative cognitive dysfunction[Title/Abstract]))

The Cochrane search terms were as follows:99

ID Search

#1 MeSH descriptor: [Dexmedetomidine] explode all trees

#2 MeSH descriptor: [Postoperative Delirium] explode all trees

#3 MeSH descriptor: [Postoperative Cognitive Dysfunction] explode all trees

#4 POD: ti,ab,kw

#5 POCD: ti,ab,kw

#6 #2 or #3or #4 or #5

#7 #1 and #6

The EMBASE search terms were as follows:169

#1 dexmedetomidine:ab,ti

#2 'postoperative delirium':ab,ti OR pod:ab,ti OR 'postoperative cognitive dysfunction':ab,ti OR  
pocd:ab,ti

#3 #1 AND #2

The CNKI search terms were as follows:755

#1 dexmedetomidine:ab,ti

#2 'postoperative delirium':ab,ti OR 'postoperative cognitive dysfunction':ab,ti

#3 #1 AND #2

---

## Supplementary Table 2 Characteristics of the included studies

| Study      | Type of surgery                                         | Number of participants (Male/Female)                | Age(year)                                                                   | Anesthesia technique                                                             | Use of dexmedetomidine                                                |                                                                                                                                    | POD/POCD measurement |
|------------|---------------------------------------------------------|-----------------------------------------------------|-----------------------------------------------------------------------------|----------------------------------------------------------------------------------|-----------------------------------------------------------------------|------------------------------------------------------------------------------------------------------------------------------------|----------------------|
|            |                                                         |                                                     |                                                                             |                                                                                  | Loading dose                                                          | Maintenance rate                                                                                                                   |                      |
| Sun 2019   | Spinal, orthopedic, urologic, thoracic, general surgery | Dex:281(161/120)<br>Con:276(154/122)                | Dex: 68.0(66.0-73.0)<br>Con: 69.0(65.0-74.0)                                | BIS-guided inhalational and intravenous general anesthesia.                      | NA                                                                    | 0.1 $\mu$ g/kg/h for 48 hours after surgery                                                                                        | CAM/CAM-ICU          |
| Zhang 2019 | Gastrointestinal surgery                                | Dex:80(51/29)<br>Con:60(40/20)                      | Dex: 73.76 $\pm$ 14.54<br>Con: 74.09 $\pm$ 13.87                            | BIS-guided total intravenous general anesthesia and all patients were intubated. | 1 $\mu$ g/kg for 15 minutes after induction                           | 0.2-0.7 $\mu$ g/kg/h until 30 minutes before the end of the surgery                                                                | MMSE                 |
| Xie 2018   | Hip fracture surgery                                    | Dex:70(38/32)<br>Con:70(36/34)                      | Dex: 68.2 $\pm$ 5.6<br>Con: 69.7 $\pm$ 5.3                                  | BIS-guided total intravenous general anesthesia.                                 | 0.5 $\mu$ g/kg for 10 minutes before induction                        | 0.4 $\mu$ g/kg/h until 30 minutes before the end of the surgery                                                                    | CAM                  |
| Ting 2019  | Lung cancer surgery                                     | Dex:173(89/84)<br>Con:173(94/79)                    | Dex:70 $\pm$ 5<br>Con: 71 $\pm$ 6                                           | BIS-guided total intravenous general anesthesia and all patients were intubated. | 0.5 $\mu$ g/kg for 20 minutes before beginning of the surgery         | 0.1 $\mu$ g/kg/h until 30 minutes before the end of the surgery                                                                    | ICDSC                |
| Lee 2018   | Laparoscopic surgery                                    | Dex1:95(44/51)<br>Dex2:114(50/64)<br>Con:109(47/62) | Group D1: 72.2 $\pm$ 5.4<br>Group D2: 73.1 $\pm$ 4.4<br>Con: 73.8 $\pm$ 6.1 | BIS-guided inhalational and intravenous general anesthesia.                      | Group D1: 1 $\mu$ g/kg for 15 minutes since induction<br>Group D2: NA | Group D1:0.2-0.7 $\mu$ g/kg/h until the end of the surgery.<br>Group D2: 1 $\mu$ g/kg for 15 minutes before the end of the surgery | CAM                  |

|                |                                                                                                             |                                                                                  |                                                                                          |                                                                                                                      |                                                           |                                                                                               |                 |
|----------------|-------------------------------------------------------------------------------------------------------------|----------------------------------------------------------------------------------|------------------------------------------------------------------------------------------|----------------------------------------------------------------------------------------------------------------------|-----------------------------------------------------------|-----------------------------------------------------------------------------------------------|-----------------|
| Li<br>2015     | laparoscopic<br>cholecystectomy                                                                             | Dex:50(28/22)<br>Con:50(26/24)                                                   | Dex: 69±5<br>Con: 70±6                                                                   | BIS-guided<br>total<br>intravenous<br>general<br>anesthesia and<br>all patients were<br>intubated.                   | 1 μ g/kg<br>for 10<br>minutes<br>following<br>induction   | 0.4 μ g/kg/h<br>until the end<br>of the<br>surgery                                            | MMSE            |
| Chen<br>2015   | Fracture,<br>prostate<br>removal,<br>gallbladder<br>surgery, radical<br>resection of<br>rectal<br>carcinoma | Dex:87(56/31)<br>Con:61(38/23)                                                   | Dex: 70.6±4.2<br>Con: 71.4±4.9                                                           | Total<br>intravenous<br>general<br>anesthesia.                                                                       | 0.5 μ<br>g/kg for<br>10<br>minutes<br>after<br>induction  | 0.2 μ g/kg/h<br>until 30<br>minutes<br>before the<br>end of the<br>surgery                    | MMSE            |
| Cheng<br>2019  | Laparotomy                                                                                                  | Dex:269(194/75)<br>Con:266(198/68)                                               | Dex:71(67-75)<br>Con:70(68-74)                                                           | BIS-guided<br>total<br>intravenous<br>general<br>anesthesia and<br>all patients were<br>intubated.                   | 0.5 μ<br>g/kg for<br>15<br>minutes<br>before<br>induction | 0.4 μ g/kg/h<br>until 30<br>minutes<br>before the<br>end of the<br>surgery since<br>induction | RCI             |
| Deiner<br>2017 | Spinal,<br>orthopedic,<br>urologic,<br>thoracic,<br>general surgery                                         | Dex:189(92/97)<br>Con:201(98/103)                                                | Dex:74.0(71.0-78.0)<br>Con:74.0(71.0-78.0)                                               | Total<br>intravenous<br>general<br>anesthesia.                                                                       | NA                                                        | 0.5 μ g/kg/h<br>until 2 hours<br>after surgery<br>since start of<br>the surgery               | CAM/CAM-<br>ICU |
| Liu<br>2015    | Joint<br>replacement<br>surgery                                                                             | Dex-<br>MCI:39(18/21)<br>Con-<br>MCI:40(23/17)<br>Dex:60(26/34)<br>Con:58(29/29) | Dex-MCI:72.84 ±<br>8.17<br>Con-MCI:75.25 ±<br>7.76<br>Dex:71.23 ±8.08<br>Con:72.81 ±9.22 | BIS-guided<br>total<br>intravenous<br>general<br>anesthesia and<br>each patient was<br>inserted a<br>laryngeal mask. | NA                                                        | 0.2-0.4 μ<br>g/kg/h<br>during the<br>surgery                                                  | CAM             |
| Su<br>2016     | Intra-<br>abdominal,<br>Intra-thoracic,<br>Spinal,<br>Urologic<br>surgery                                   | Dex:350(NA)<br>Con:350(NA)                                                       | Over 65 years old                                                                        | Total<br>intravenous<br>anesthesia or<br>combined<br>epidural-general<br>anesthesia.                                 | NA                                                        | 0.1 μ g/kg/h<br>for 24 hours<br>after surgery                                                 | CAM-ICU         |
| Wu<br>2016     | Intra-<br>abdominal,<br>Intra-thoracic,<br>Spinal,<br>Superficial<br>surgery.                               | Dex:38(24/18)<br>Con:38(20/18)                                                   | Dex:74±5<br>Con:76±6                                                                     | General<br>anesthesia or<br>combined<br>epidural-general<br>anesthesia.                                              | NA                                                        | 0.1 μ g/kg/h<br>for 15 hours<br>after surgery                                                 | CAM-ICU         |

|              |                                |                                     |                              |                                                                                                               |                                                           |                                                                            |                 |
|--------------|--------------------------------|-------------------------------------|------------------------------|---------------------------------------------------------------------------------------------------------------|-----------------------------------------------------------|----------------------------------------------------------------------------|-----------------|
| He<br>2018   | Vertebral<br>osteotomy         | Dex:30(16/14)<br>Con:30(17/13)      | Dex:82.5±5.4<br>Con:83.2±5.1 | BIS-guided<br>inhalational and<br>intravenous<br>general<br>anesthesia and<br>all patients were<br>intubated. | 0.5 μ<br>g/kg for<br>10<br>minutes<br>before<br>induction | 0.4 μ g/kg/h<br>until the end<br>of the<br>surgery                         | CAM             |
| Xuan<br>2018 | Joint<br>replacement           | Dex:227(96/131)<br>Con:226(101/125) | Dex:66.6±7.5<br>Con:66.9±5.1 | BIS-guided<br>total<br>intravenous<br>general<br>anesthesia and<br>all patients were<br>intubated.            | NA                                                        | 0.1 μ g/kg/h<br>for 3 days<br>after surgery                                | CAM/CAM-<br>ICU |
| Ma<br>2013   | Orthopedic<br>surgery          | Dex:30(10/20)<br>Con:30(18/12)      | Dex:69.1±7.0<br>Con:67.6±7.5 | Total<br>intravenous<br>general<br>anesthesia and<br>all patients were<br>intubated.                          | 1 μ g/kg<br>for 10<br>minutes<br>before<br>induction      | 0.5 μ g/kg/h<br>until 30<br>minutes<br>before the<br>end of the<br>surgery | CAM             |
| Guo<br>2015  | Oral cancer<br>radical surgery | Dex:78(39/39)<br>Con:78(41/37)      | Dex:70.7±4.6<br>Con:71.9±5.1 | BIS-guided<br>inhalational and<br>intravenous<br>general<br>anesthesia. All<br>patients were<br>intubated.    | NA                                                        | 0.2 μ g/kg/h<br>for 12 hours<br>since 2 hours<br>after surgery             | CAM-ICU         |

30 Data are number, mean ± standard deviation or median(interquartile range).

31 DEX,dexmedetomidine; Con,control; BIS,bispectral index; POD,postoperative delirium; POCD,postoperative cognitive  
32 dysfunction; MMSE, Mini-Mental State Examination; CAM,Confusion Assessment Method; CAM-ICU,Confusion Assessment  
33 Method for Intensive Care Units; RCI,Robust Change Index; ICDSC,Intensive Care Delirium Screening Checklist; MCI,Mild  
34 Cognitive Impairment; NA,not applicable.

35

36

37 Supplementary Table 3 Descriptions of instruments used in the enrolled trials

|                                      |                                                                                                                                                                                                                                                                                                                                                                                                                                                                                                                                                       |
|--------------------------------------|-------------------------------------------------------------------------------------------------------------------------------------------------------------------------------------------------------------------------------------------------------------------------------------------------------------------------------------------------------------------------------------------------------------------------------------------------------------------------------------------------------------------------------------------------------|
| MMSE (Mini-Mental State Examination) | The MMSE, compiled by Folstein et al.(1975), is one of the most influential standardized Mental State Examination tools. As a cognitive impairment Examination method, MMSE can be used for the screening of Alzheimer's disease, which is simple and easy to implement.                                                                                                                                                                                                                                                                              |
| CAM (Confusion Assessment Method)    | The CAM is a nine-item delirium diagnostic scale based on the DSM-III-R criteria for delirium. A unique and helpful feature of the CAM is that it has been simplified into a diagnostic algorithm that includes only four items of the CAM designed for rapid identification of delirium by nonpsychiatrists. The four-item algorithm requires the presence of: (a) acute onset and fluctuating course, (b) inattention, and either (c) disorganized thinking, or (d) altered level of consciousness. CAM has also been validated in palliative care. |

|                                                                               |                                                                                                                                                                                                                                                                                                                                                                                                                                                                                                                                                                                                                                                                                                                                  |
|-------------------------------------------------------------------------------|----------------------------------------------------------------------------------------------------------------------------------------------------------------------------------------------------------------------------------------------------------------------------------------------------------------------------------------------------------------------------------------------------------------------------------------------------------------------------------------------------------------------------------------------------------------------------------------------------------------------------------------------------------------------------------------------------------------------------------|
| CAM-ICU<br>(Confusion<br>Assessment<br>Method for<br>Intensive Care<br>Units) | The CAM-ICU is an adapted version of the bedside assessment tool for non-psychiatrists, the Confusion Assessment Method(CAM), which was based on the Diagnostic and Statistical Manual of Mental Disorders, Third Edition, Re-vised (DSM-III-R). The CAM-ICU demonstrates good validity and reliability when administered by ICU nurses and physicians for both ventilated and non-ventilated ICU patients. Both CAM and CAM-ICU make the diagnosis according to four features of delirium: (1) acute onset and fluctuating course, (2) inattention, (3) disorganized thinking, and (4) altered level of consciousness. The diagnosis of delirium was determined by the presence of features 1 and 2 plus either feature 3 or 4. |
| RCI (Reliable<br>change index)                                                | The RCI is a simple statistical computation which estimate if changes in two psychometric measures are probably due to measurement error or can be accounted by other factor, as a clinical intervention. Despite its clinical usefulness, the method is underutilized by psychiatrists and psychologists.                                                                                                                                                                                                                                                                                                                                                                                                                       |
| ICDSC<br>(Intensive Care<br>Delirium<br>Screening<br>Checklist)               | According to ICDSC, we can define delirium as mild delirium (ICDSC score 4-5), moderate delirium (ICDSC score 6-7) and severe delirium (ICDSC score 8).                                                                                                                                                                                                                                                                                                                                                                                                                                                                                                                                                                          |

55  
56  
57  
58  
59  
60  
61  
62  
63  
64  
65  
66  
67  
68  
69  
70  
71  
72

Supplementary Figure 1 Flow diagram of the article-screening process

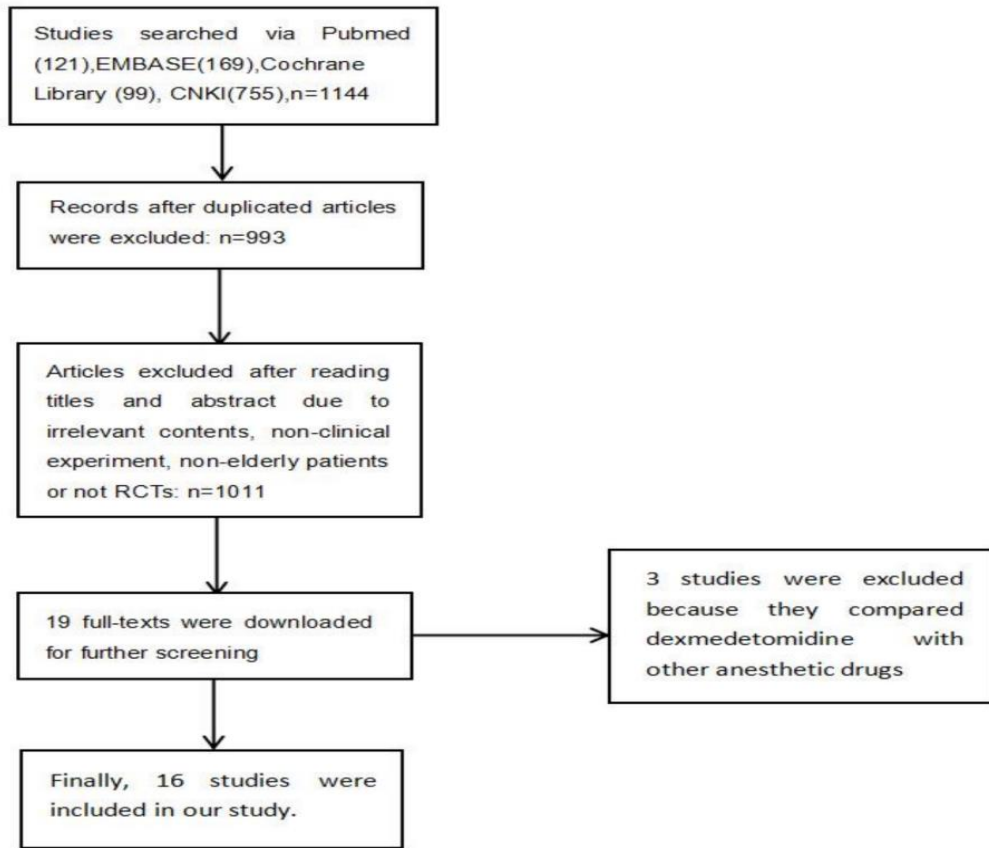

73  
74  
75  
76

Supplementary Figure 2 Meta-analysis for the incidence of hypotension

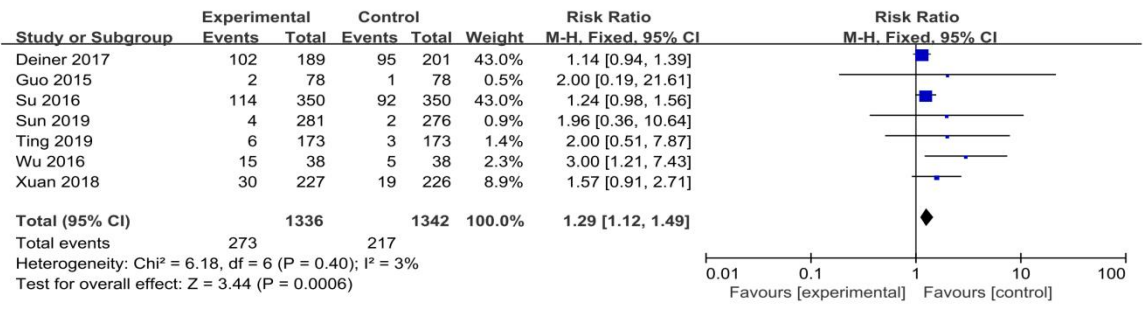

77  
78  
79  
80

Supplementary Figure 3 Meta-analysis for the incidence of bradycardia

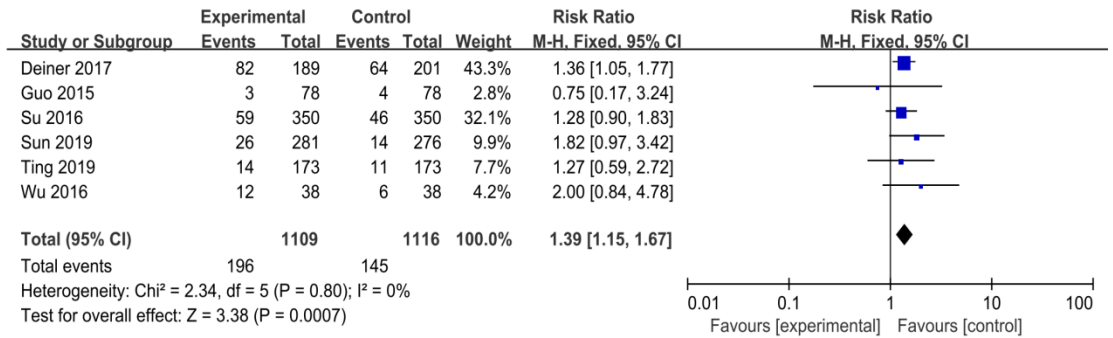

81  
82  
83

Supplementary Figure 4 Meta-analysis for the incidence of PONV

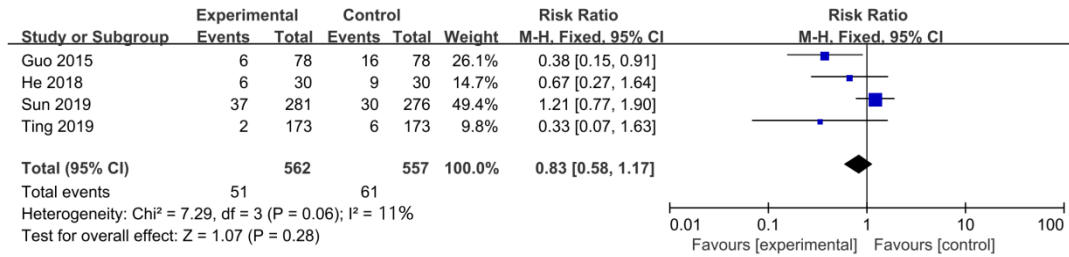

Supplementary Figure 5 Meta-analysis for the incidence of mortality

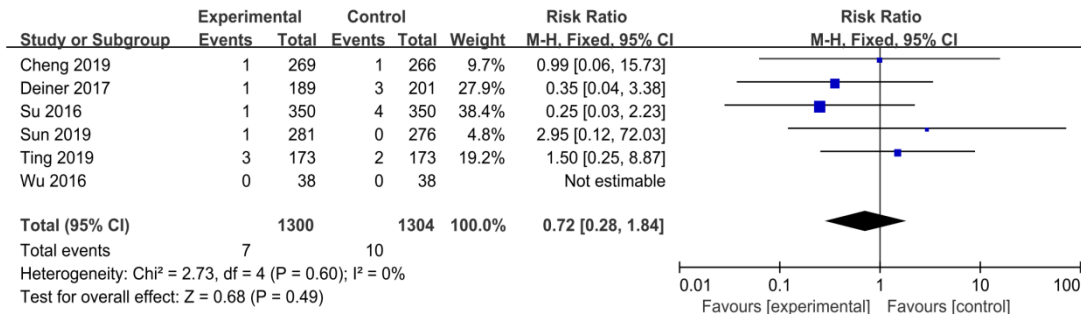

Supplementary Figure 6 Sensitivity analysis by excluding certain studies

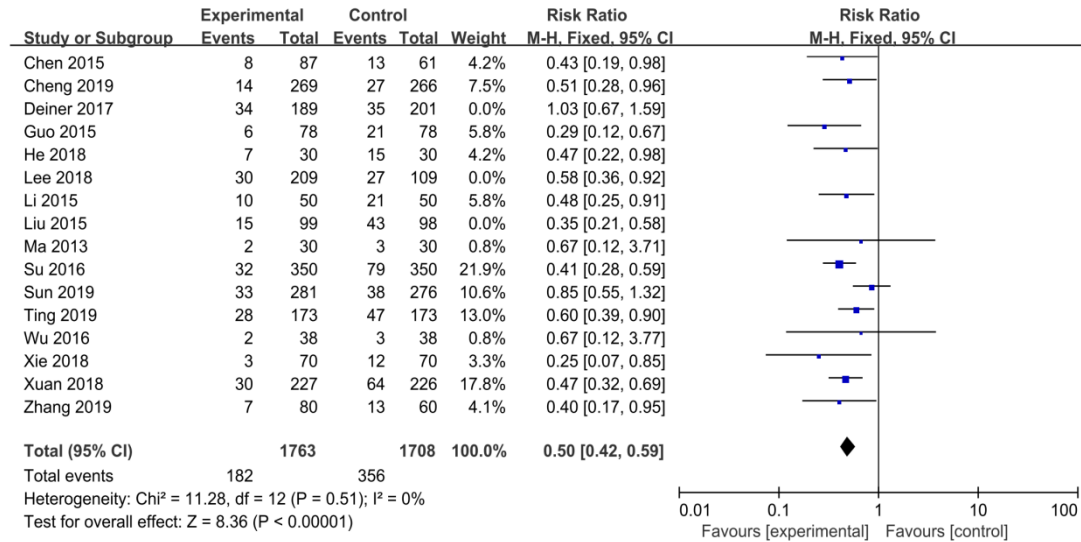

Supplementary Figure 7 Risk of bias summary

|             | Random sequence generation (selection bias) | Allocation concealment (selection bias) | Blinding of participants and personnel (performance bias) | Blinding of outcome assessment (detection bias) | Incomplete outcome data (attrition bias) | Selective reporting (reporting bias) | Other bias |
|-------------|---------------------------------------------|-----------------------------------------|-----------------------------------------------------------|-------------------------------------------------|------------------------------------------|--------------------------------------|------------|
| Chen 2015   | +                                           | +                                       | ⊖                                                         | +                                               | +                                        | +                                    | +          |
| Cheng 2019  | +                                           | +                                       | ?                                                         | +                                               | ?                                        | +                                    | +          |
| Deiner 2017 | +                                           | +                                       | +                                                         | +                                               | +                                        | +                                    | +          |
| Guo 2015    | ?                                           | ?                                       | ?                                                         | ?                                               | +                                        | +                                    | +          |
| He 2018     | +                                           | ?                                       | ?                                                         | ?                                               | +                                        | +                                    | +          |
| Lee 2018    | +                                           | ?                                       | ⊖                                                         | +                                               | +                                        | +                                    | +          |
| Li 2015     | +                                           | +                                       | +                                                         | +                                               | +                                        | +                                    | +          |
| Liu 2015    | +                                           | +                                       | +                                                         | +                                               | +                                        | +                                    | +          |
| Ma 2013     | +                                           | +                                       | +                                                         | +                                               | +                                        | +                                    | +          |
| Su 2016     | +                                           | +                                       | +                                                         | +                                               | +                                        | +                                    | +          |
| Sun 2019    | +                                           | +                                       | +                                                         | ?                                               | ?                                        | ?                                    | +          |
| Ting 2019   | +                                           | +                                       | ?                                                         | ?                                               | +                                        | +                                    | +          |
| Wu 2016     | +                                           | +                                       | +                                                         | +                                               | +                                        | +                                    | +          |
| Xie 2018    | +                                           | +                                       | ?                                                         | ?                                               | +                                        | +                                    | +          |
| Xuan 2018   | +                                           | +                                       | +                                                         | +                                               | +                                        | ⊖                                    | +          |
| Zhang 2019  | +                                           | ⊖                                       | +                                                         | +                                               | +                                        | ?                                    | +          |

Supplementary Figure 8 Risk of bias graph

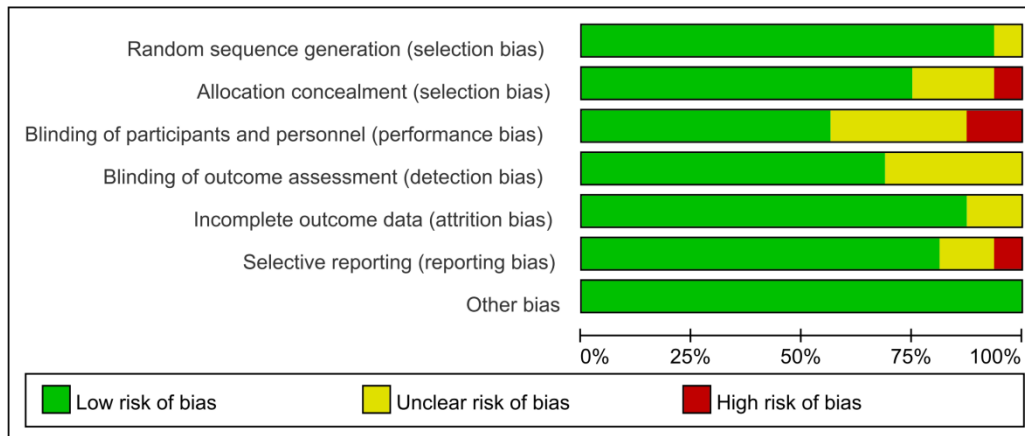

Supplementary Figure 9 The funnel plot for assessment of the publication bias



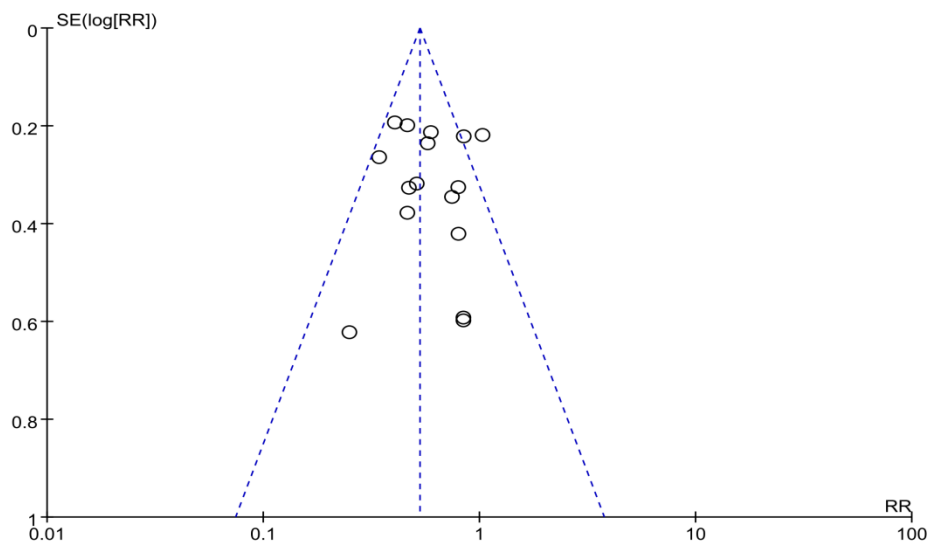

106  
107  
108  
109  
110  
111  
112  
113  
114  
115  
116  
117  
118  
119  
120  
121  
122  
123  
124  
125  
126  
127  
128  
129  
130  
131  
132  
133  
134  
135  
136  
137  
138  
139  
140  
141

Raw data  
Primary outcome: POD/POCD  
Intraoperative use of dexmedetomidine

| Study      | Dexmedetomidine |       | Control |       |
|------------|-----------------|-------|---------|-------|
|            | Events          | Total | Events  | Total |
| He 2018    | 7               | 30    | 15      | 30    |
| Ma 2013    | 2               | 30    | 3       | 30    |
| Lee 2018   | 30              | 209   | 27      | 109   |
| Liu 2015   | 15              | 99    | 43      | 98    |
| Cheng 2019 | 14              | 269   | 27      | 266   |
| Zhang 2019 | 7               | 80    | 13      | 60    |
| Xie 2018   | 3               | 70    | 12      | 70    |
| Li 2015    | 10              | 50    | 21      | 50    |
| Chen 2015  | 8               | 87    | 13      | 61    |

Perioperative use of dexmedetomidine

| Study       | Dexmedetomidine |       | Control |       |
|-------------|-----------------|-------|---------|-------|
|             | Events          | Total | Events  | Total |
| Deiner 2017 | 34              | 189   | 35      | 201   |
| Guo 2015    | 6               | 78    | 21      | 78    |
| Su 2016     | 32              | 350   | 79      | 350   |
| Xuan 2018   | 30              | 227   | 64      | 226   |
| Wu 2016     | 2               | 38    | 3       | 38    |
| Sun 2019    | 33              | 281   | 38      | 276   |
| Ting 2019   | 28              | 173   | 47      | 173   |

With a loading dose

| Study      | Dexmedetomidine |       | Control |       |
|------------|-----------------|-------|---------|-------|
|            | Events          | Total | Events  | Total |
| He 2018    | 7               | 30    | 15      | 30    |
| Ma 2013    | 2               | 30    | 3       | 30    |
| Lee 2018   | 30              | 209   | 27      | 109   |
| Zhang 2019 | 7               | 80    | 13      | 60    |
| Xie 2018   | 3               | 70    | 12      | 70    |
| Ting 2019  | 28              | 173   | 47      | 173   |
| Li 2015    | 10              | 50    | 21      | 50    |
| Chen 2015  | 8               | 87    | 13      | 61    |
| Cheng 2019 | 14              | 269   | 27      | 266   |

Without a loading dose

| Study       | Dexmedetomidine |       | Control |       |
|-------------|-----------------|-------|---------|-------|
|             | Events          | Total | Events  | Total |
| Deiner 2017 | 34              | 189   | 35      | 201   |
| Guo 2015    | 6               | 78    | 21      | 78    |
| Su 2016     | 32              | 350   | 79      | 350   |
| Xuan 2018   | 30              | 227   | 64      | 226   |
| Liu 2015    | 15              | 99    | 43      | 98    |
| Sun 2019    | 33              | 281   | 38      | 276   |
| Wu 2016     | 2               | 38    | 3       | 38    |

Bradycardia

| Study       | Dexmedetomidine |       | Control |       |
|-------------|-----------------|-------|---------|-------|
|             | Events          | Total | Events  | Total |
| Deiner 2017 | 82              | 189   | 64      | 201   |
| Su 2016     | 59              | 350   | 46      | 350   |
| Wu 2016     | 12              | 38    | 6       | 38    |
| Ting 2019   | 14              | 173   | 11      | 173   |
| Sun 2019    | 26              | 281   | 14      | 276   |
| Guo 2015    | 3               | 78    | 4       | 78    |

Hypotension

| Study       | Dexmedetomidine |       | Control |       |
|-------------|-----------------|-------|---------|-------|
|             | Events          | Total | Events  | Total |
| Deiner 2017 | 102             | 189   | 95      | 201   |
| Su 2016     | 114             | 350   | 92      | 350   |
| Wu 2016     | 15              | 38    | 5       | 38    |
| Guo 2015    | 2               | 78    | 1       | 78    |
| Xuan 2018   | 30              | 227   | 19      | 226   |
| Ting 2019   | 6               | 173   | 3       | 173   |
| Sun 2019    | 4               | 281   | 2       | 276   |

191  
192  
193  
194  
195  
196  
197  
198  
199  
200  
201  
202  
203  
204  
205  
206  
207  
208  
209

All-cause mortality

| Study       | Dexmedetomidine |       | Control |       |
|-------------|-----------------|-------|---------|-------|
|             | Events          | Total | Events  | Total |
| Deiner 2017 | 1               | 189   | 3       | 201   |
| Cheng 2019  | 1               | 269   | 1       | 266   |
| Su 2016     | 1               | 350   | 4       | 350   |
| Wu 2016     | 0               | 38    | 0       | 38    |
| Ting 2019   | 3               | 173   | 2       | 173   |
| Sun 2019    | 1               | 281   | 0       | 276   |

Nausea and vomiting

| Study     | Dexmedetomidine |       | Control |       |
|-----------|-----------------|-------|---------|-------|
|           | Events          | Total | Events  | Total |
| He 2018   | 6               | 30    | 9       | 30    |
| Guo 2015  | 6               | 78    | 16      | 78    |
| Ting 2019 | 2               | 173   | 6       | 173   |
| Sun 2019  | 37              | 281   | 30      | 276   |
